# Supplementary material for: In Situ Fenton Triggered PDA Coating Copper Mesh with Underwater Superoleophobic Property for Oily Wastewater Pretreatment
Source: MDPI journal article supplement (doi:10.3390/pr9091665), 2021-09-15
Supplement: s1 [file s1]

Supplementary material for

**Bioinspired, rough, hydrostable and underwater superoleophobic  
copper mesh for oily wastewater pretreatment**

*Ying Xu,<sup>a</sup> Zhiwei Zhao,<sup>b</sup> Jiaxiang Ma,<sup>a</sup> Zhigao Zhu,<sup>a</sup> Fuyi Cui,<sup>a</sup> Wei Wang,<sup>a</sup> Yan*

*Liu,<sup>\*a</sup>*

<sup>a</sup> State Key Laboratory of Urban Water Resource and Environment, Harbin Institute of Technology, Harbin 150000, China.

<sup>b</sup> School of Urban Construction and Environmental Engineering, Chongqing University, Chongqing 400045, China.

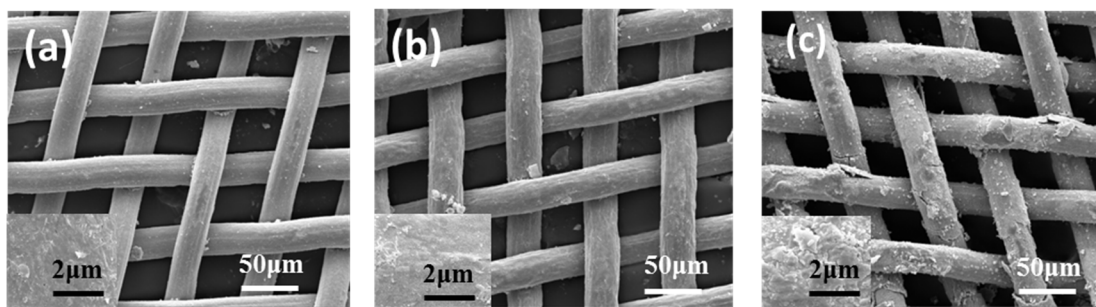

**Figure S1.** SEM images of copper mesh etching within 10min (a), 20min (b), 30min (c). Insets show the high resolution SEM images of the corresponding samples, respectively.

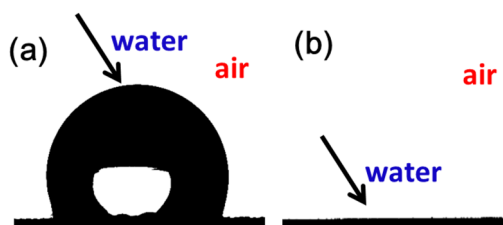

**Figure S2.** The water contact angles of (a) the pristine mesh, (b) the ETCu/20.

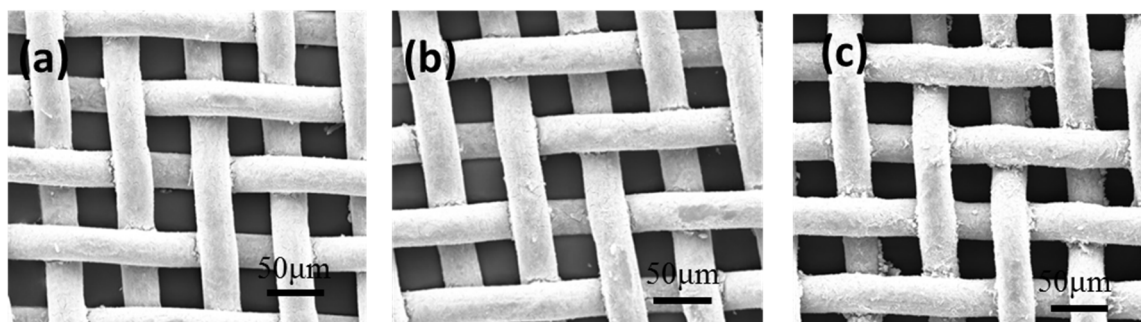

**Figure S3.** SEM images were copper meshes coated by PDA within 20min (a), 40min (b), 60min (c).

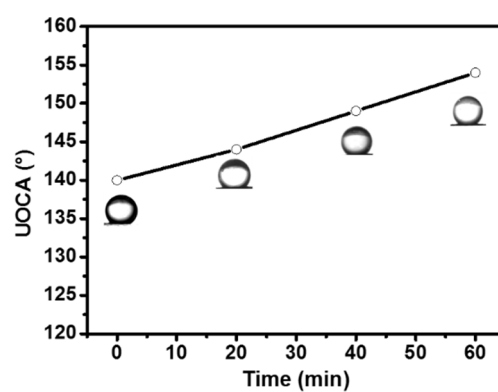

**Figure S4.** The UOCAs of the copper meshes coated by Fenton triggered PDA within 0min, 20min, 40min and 60min.

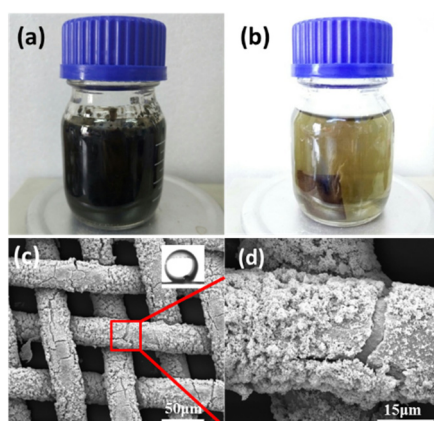

**Figure S5.** (a) Picture of 60min PDA solution using Fenton triggered PDA method. (b) Picture of 60min PDA solution using traditional method. (c-d) SEM images of PDA coating using traditional method within 24h.
